# Supplementary material
Source: PubMed Central journal article supplement (PMC4566211)
Supplement: supp_M115.661074_M661074_-_supplementary_information.pdf [file supp_M115.661074_M661074_-_supplementary_information.pdf]

**Title: Targeting the binding interface on a shared receptor subunit of a cytokine family enables the inhibition of multiple member-cytokines with selectable target spectrum.**

Toshie Nata<sup>1\*</sup>, Asjad Basheer<sup>2\*</sup>, Fiorenza Cocchi<sup>1</sup>, , Richard van Besien<sup>1</sup>, Raya Massoud<sup>3</sup>, Steven Jacobson<sup>3</sup>, Nazli Azimi<sup>2</sup>, and Yutaka Tagaya<sup>1</sup>,

<sup>1</sup>Cell Biology Lab, Division of Basic Science, Institute of Human Virology, University of Maryland School of Medicine, 725 W. Lombard Street, Baltimore MD 21201

<sup>2</sup>BIONIZ Inc., 5 Mason Lane Suite 200, Irvine, CA 92618

<sup>3</sup>Section of Neuroimmunology, National Institute of Neuronal Disease and Sclerosis, National Institutes of Health, 10 Center Drive, Bethesda, MD 20890

# Supplementary Figure 1

A

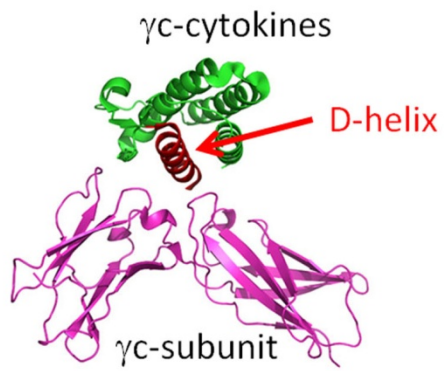

B

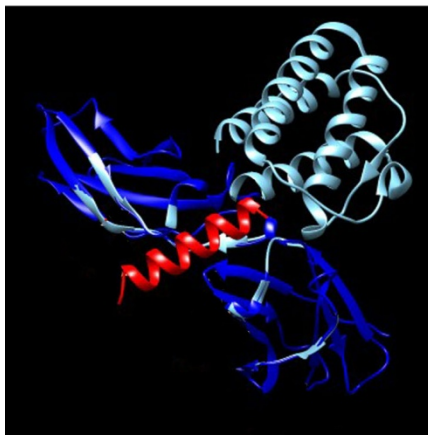

C

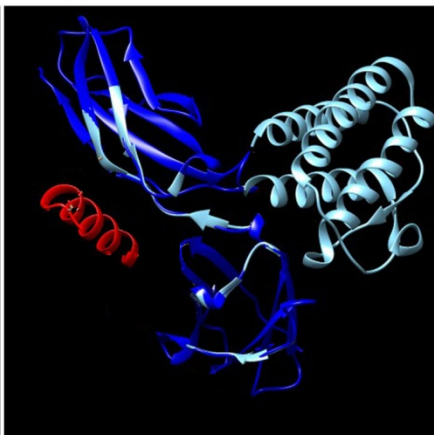

D

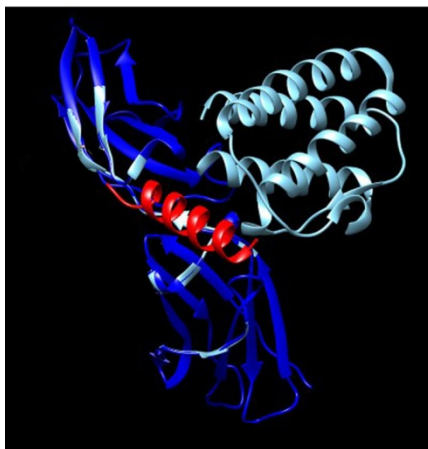

E

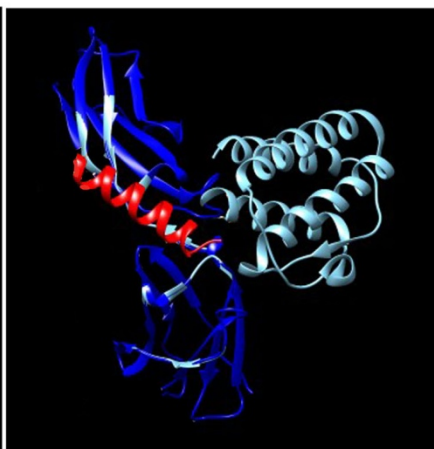

F

| 1 | 2 | 3 | 4 | 5 | 6 | 7 | 8 | 9 | 10  | 11 | 12 | 13 | 14  | 15 | 16 | 17  | 18 | 19 |
|---|---|---|---|---|---|---|---|---|-----|----|----|----|-----|----|----|-----|----|----|
| I |   | E | F | L | Q |   |   | I | H/T | I  |    | Q  | M/S |    | I  | N/S | T  | S  |

### Figure S1 Computer-assisted docking simulation of candidate peptides.

The 120 candidate peptides designed by the criteria shown below (Table S2) were then analyzed by a series of computer-assisted docking algorithm whether their binding to  $\gamma c$  show overlap with the binding interfere between IL-2 or IL-15 vs.  $\gamma c$  (deduced from PDB 2ERJ or 4GS7).

**A:** binding of IL-15 (blue) to  $\gamma c$  (red) depicting the geometry and location of the D-helix of IL-15 with respect to the  $\gamma c$  molecule.

**B:** An example of inclusion to the second-round screening ; Peptides that show interfering geometry to the IL-15/ $\gamma c$  interaction (deduced from the IL-15 vs.  $\alpha$ - $\beta$ - $\gamma$  ternary receptor-complex , PDB; 4GS7).

**C:** An example excluded from the second-round screening; Peptides that show non-interfering geometry to the cytokine-receptor binding.

**D.** Simulated binding geometry of the isolated Helix D of IL-2

**E.** Simulated binding geometry of the isolated Helix D of IL-2

To demonstrate that the isolated Helix D from either cytokine could potentially bind to the  $\gamma c$  in a different geometry than does the whole original cytokine, binding of the D-helix (of IL-2 or IL-15) and that of the cytokine to  $\gamma c$ -were overlaid in the same picture. This could be explained by the interaction of A-C helices of these cytokines with private chains. Obviously, all these speculations need experimental confirmation which is in progress.

**F.** Construction logic behind the design of BNZ132-1.

Based on previous reports on the interaction of IL-2/IL-15 and their hetero-trimeric receptor complexes including the  $\gamma c$  molecule ((1,2), the following logic was adopted for the design of BNZ132-1 peptide. Amino acids shown in Bold Red above indicate "Fixed" residues. Positions at 10, 14, and 17 allow some "flexibility" but participate in the physical interaction of cytokines vs  $\gamma c$  therefore denoted "high priority wobble" below.

[Algorithm of Screening]; We mutated the "wobble" residues *in silico* (total 120 possible peptides, shown in Table S2) and ran docking simulation to the  $\gamma c$ -molecule for each one of them. This screening was used to "eliminate" those that do not show binding to the  $\gamma c$  at the correct position (the binding pocket for IL-2 or IL-15). Nearly 80% of the candidates were dropped by the *in silico* screening, after which the remaining peptides were synthesized in small scale (Bachem, Torrance CA) and tested by biological assays involving recombinant IL-2/IL-15 and CTLL-2 cell line (see Experimental Procedures in the main text). Finally we chose the BNZ132-1 which showed the most potent inhibition on both cytokines.

Fixed positions from binding chemistry (emphasized with yellow boxes):

Gln13, Ile16 –identical binding residues between human IL-2 and IL-15.

Gln6 - this position participates in the binding only in IL-2, but not with IL-15. Fixing it with Asn (IL-2 specific residue) may add IL-2-biased characteristic to the peptide. Therefore, Gln was adopted from the IL-15 sequence, but this should have neutral effect on the binding of the peptide to  $\gamma c$ .

Fixed positions from shared amino acid usages (emphasized by magenta boxes):

Ile1, Glu3, Phe 4, Leu5, Thr18 – these residues do not participate directly in the binding between cytokines' D-helices and the  $\gamma c$ -molecule. However, these amino acids were conserved between human IL-2 and IL-15.

Fixed positions from favored amino acid usages across mammalian species:

Ile9 – Although human IL-15 has Val at this position, murine IL-15 and most mammalian IL-2 has I at this position.

Ile11 – similar to Ile9, except that mouse IL-2 and mammalian IL-15 use Ile at this position.

Ser19 – Many mammalian IL-15 and rat IL-2 use Ser at this position.

High priority “Wobble” positions from binding chemistry:

His10 or Thr10, Met14 or Ser14, Asn17 or Ser17 – these amino acids in either cytokine are in contact with the surface of the  $\gamma$ c-molecule. We have tested combining two from one cytokine and the last from the other cytokine. In other words, these three positions were designed with a linkage to each other. Three out of IL-2 or three out of IL-15 for these positions might cause structural bias and thus have been eliminated.

Low priority “Wobble” positions: 2,7,8,12,15

As the positions that have been fixed based on the logic shown above could introduce bias either to IL-2 or IL-15 sequence, these low-priority positions could provide leverage. However, these five positions have weaker impact on the binding chemistry, and thus we did not seek for a perfect counter-balance from these positions. For example, if His10, Met14 have been chosen from IL-15 and Ser17 from IL-2, then we allowed either three from IL-2+two from IL-15, or two from IL-2+three from IL-15 at these five positions.

### Supplementary Table 1

| ID | Number of the $\gamma$ c-member cytokines | IL-2 | IL-4 | IL-7 | IL-9 | IL-15 | IL-21 | Existing targeting compounds | Target Diseases |
|----|-------------------------------------------|------|------|------|------|-------|-------|------------------------------|-----------------|
| 1  | 6                                         | ■    | ■    | ■    | ■    | ■     | ■     | Tofacitinib (CP590,660)      |                 |
| 2  | 5                                         | ■    | ■    | ■    | ■    | ■     |       |                              |                 |
| 3  | 5                                         | ■    | ■    | ■    | ■    | ■     |       |                              |                 |
| 4  | 5                                         | ■    | ■    | ■    | ■    | ■     |       |                              |                 |
| 5  | 5                                         | ■    | ■    | ■    | ■    | ■     |       |                              |                 |
| 6  | 5                                         | ■    | ■    | ■    | ■    | ■     |       |                              |                 |
| 7  | 5                                         | ■    | ■    | ■    | ■    | ■     |       |                              |                 |
| 8  | 4                                         | ■    | ■    | ■    | ■    |       |       |                              |                 |
| 9  | 4                                         | ■    | ■    | ■    | ■    |       |       |                              |                 |
| 10 | 4                                         | ■    | ■    | ■    | ■    |       |       |                              |                 |
| 11 | 4                                         | ■    | ■    | ■    | ■    |       |       |                              |                 |
| 12 | 4                                         | ■    | ■    | ■    | ■    |       |       |                              |                 |
| 13 | 4                                         | ■    | ■    | ■    | ■    |       |       |                              |                 |
| 14 | 4                                         | ■    | ■    | ■    | ■    |       |       |                              |                 |
| 15 | 4                                         | ■    | ■    | ■    | ■    |       |       |                              |                 |
| 16 | 4                                         | ■    | ■    | ■    | ■    |       |       |                              |                 |
| 17 | 4                                         | ■    | ■    | ■    | ■    |       |       |                              |                 |
| 18 | 4                                         | ■    | ■    | ■    | ■    |       |       |                              |                 |
| 19 | 4                                         | ■    | ■    | ■    | ■    |       |       |                              |                 |
| 20 | 4                                         | ■    | ■    | ■    | ■    |       |       |                              |                 |
| 21 | 4                                         | ■    | ■    | ■    | ■    |       |       |                              |                 |
| 22 | 4                                         | ■    | ■    | ■    | ■    |       |       |                              |                 |
| 23 | 3                                         | ■    | ■    | ■    |      |       |       |                              |                 |
| 24 | 3                                         | ■    | ■    | ■    |      |       |       |                              |                 |
| 25 | 3                                         | ■    | ■    | ■    |      |       |       |                              |                 |
| 26 | 3                                         | ■    | ■    | ■    |      |       |       |                              |                 |
| 27 | 3                                         | ■    | ■    | ■    |      |       |       |                              |                 |
| 28 | 3                                         | ■    | ■    | ■    |      |       |       |                              |                 |
| 29 | 3                                         | ■    | ■    | ■    |      |       |       |                              |                 |
| 30 | 3                                         | ■    | ■    | ■    |      |       |       |                              |                 |
| 31 | 3                                         | ■    | ■    | ■    |      |       |       |                              |                 |
| 32 | 3                                         | ■    | ■    | ■    |      |       |       |                              |                 |
| 33 | 3                                         | ■    | ■    | ■    |      |       |       |                              |                 |
| 34 | 3                                         | ■    | ■    | ■    |      |       |       |                              |                 |
| 35 | 3                                         | ■    | ■    | ■    |      |       |       |                              |                 |
| 36 | 3                                         | ■    | ■    | ■    |      |       |       |                              |                 |
| 37 | 3                                         | ■    | ■    | ■    |      |       |       |                              |                 |
| 38 | 3                                         | ■    | ■    | ■    |      |       |       |                              |                 |
| 39 | 3                                         | ■    | ■    | ■    |      |       |       |                              |                 |
| 40 | 3                                         | ■    | ■    | ■    |      |       |       |                              |                 |
| 41 | 3                                         | ■    | ■    | ■    |      |       |       |                              |                 |
| 42 | 3                                         | ■    | ■    | ■    |      |       |       |                              |                 |
| 43 | 2                                         | ■    | ■    |      |      |       |       |                              |                 |
| 44 | 2                                         | ■    | ■    |      |      |       |       |                              |                 |
| 45 | 2                                         | ■    | ■    |      |      |       |       |                              |                 |
| 46 | 2                                         | ■    | ■    |      |      |       |       |                              |                 |
| 47 | 2                                         | ■    | ■    |      |      |       |       |                              |                 |
| 48 | 2                                         | ■    | ■    |      |      |       |       |                              |                 |
| 49 | 2                                         | ■    | ■    |      |      |       |       |                              |                 |
| 50 | 2                                         | ■    | ■    |      |      |       |       |                              |                 |
| 51 | 2                                         | ■    | ■    |      |      |       |       |                              |                 |
| 52 | 2                                         | ■    | ■    |      |      |       |       |                              |                 |
| 53 | 2                                         | ■    | ■    |      |      |       |       |                              |                 |
| 54 | 2                                         | ■    | ■    |      |      |       |       |                              |                 |
| 55 | 2                                         | ■    | ■    |      |      |       |       |                              |                 |
| 56 | 2                                         | ■    | ■    |      |      |       |       |                              |                 |
| 57 | 2                                         | ■    | ■    |      |      |       |       |                              |                 |
| 58 | 1                                         | ■    | ■    |      |      |       |       |                              |                 |
| 59 | 1                                         | ■    | ■    |      |      |       |       |                              |                 |
| 60 | 1                                         | ■    | ■    |      |      |       |       |                              |                 |
| 61 | 1                                         | ■    | ■    |      |      |       |       |                              |                 |
| 62 | 1                                         | ■    | ■    |      |      |       |       |                              |                 |
| 63 | 1                                         | ■    | ■    |      |      |       |       |                              |                 |

**Table S1 Provisional library of compounds that comprehensively inhibit any possible combinations of the 6  $\gamma$ c-cytokines that are potentially represented in human diseases.**

The expansion of our current concept may have useful clinical ramifications. The  $\gamma$ c-family is a mathematical group of 6 members. There exist 63 subsets ( ${}_6C_6+{}_6C_5+{}_6C_4+{}_6C_3+{}_6C_2+{}_6C_1=63$ ) that consist of differential combinations of all 6 members (Supplementary Table 2). It may be possible to eventually



## Supplemental Experimental Procedures;

### *Protein docking simulation*

3D structure of each peptide was constructed using the Pep-fold algorithm (9-11). Binding of each peptide and the  $\gamma$ C-molecule was calculated using PatchDock (12) and FireDock (13,14). Binding solutions with Gibbs free energy less than -15k J/mol were considered non-significant.

1. Wang, S., Zhang, Z. X., Yin, Z., Liu, W., Garcia, B., Huang, X., Acott, P., and Jevnikar, A. M. (2011) Anti-IL-2 receptor antibody decreases cytokine-induced apoptosis of human renal tubular epithelial cells (TEC). *Nephrology, dialysis, transplantation : official publication of the European Dialysis and Transplant Association - European Renal Association* **26**, 2144-2153
2. Ring, A. M., Lin, J. X., Feng, D., Mitra, S., Rickert, M., Bowman, G. R., Pande, V. S., Li, P., Moraga, I., Spolski, R., Ozkan, E., Leonard, W. J., and Garcia, K. C. (2012) Mechanistic and structural insight into the functional dichotomy between IL-2 and IL-15. *Nature immunology* **13**, 1187-1195
3. Malek, T. R., Yu, A., Vincek, V., Scibelli, P., and Kong, L. (2002) CD4 regulatory T cells prevent lethal autoimmunity in IL-2Rbeta-deficient mice. Implications for the nonredundant function of IL-2. *Immunity* **17**, 167-178
4. Glas, J., Stallhofer, J., Ripke, S., Wetzke, M., Pfennig, S., Klein, W., Epplen, J. T., Griga, T., Schiemann, U., Lacher, M., Koletzko, S., Folwaczny, M., Lohse, P., Goke, B., Ochsenkuhn, T., Muller-Myhsok, B., and Brand, S. (2009) Novel genetic risk markers for ulcerative colitis in the IL2/IL21 region are in epistasis with IL23R and suggest a common genetic background for ulcerative colitis and celiac disease. *The American journal of gastroenterology* **104**, 1737-1744
5. Marquez, A., Orozco, G., Martinez, A., Palomino-Morales, R., Fernandez-Arquero, M., Mendoza, J. L., Taxonera, C., Diaz-Rubio, M., Gomez-Garcia, M., Nieto, A., Lopez-Nevot, M. A., de la Concha, E. G., Martin, J., and Urcelay, E. (2009) Novel association of the interleukin 2-interleukin 21 region with inflammatory bowel disease. *The American journal of gastroenterology* **104**, 1968-1975
6. DePaolo, R. W., Abadie, V., Tang, F., Fehlner-Peach, H., Hall, J. A., Wang, W., Marietta, E. V., Kasarda, D. D., Waldmann, T. A., Murray, J. A., Semrad, C., Kupfer, S. S., Belkaid, Y., Guandalini,

- S., and Jabri, B. (2011) Co-adjuvant effects of retinoic acid and IL-15 induce inflammatory immunity to dietary antigens. *Nature* **471**, 220-224
7. Meresse, B., Malamut, G., and Cerf-Bensussan, N. (2012) Celiac disease: an immunological jigsaw. *Immunity* **36**, 907-919
  8. Antoniu, S. A. (2010) MEDI-528, an anti-IL-9 humanized antibody for the treatment of asthma. *Current opinion in molecular therapeutics* **12**, 233-239
  9. Maupetit, J., Derreumaux, P., and Tuffery, P. (2010) A fast method for large-scale de novo peptide and miniprotein structure prediction. *Journal of computational chemistry* **31**, 726-738
  10. Maupetit, J., Derreumaux, P., and Tuffery, P. (2009) PEP-FOLD: an online resource for de novo peptide structure prediction. *Nucleic acids research* **37**, W498-503
  11. Thevenet, P., Shen, Y., Maupetit, J., Guyon, F., Derreumaux, P., and Tuffery, P. (2012) PEP-FOLD: an updated de novo structure prediction server for both linear and disulfide bonded cyclic peptides. *Nucleic acids research* **40**, W288-293
  12. Schneidman-Duhovny, D., Inbar, Y., Nussinov, R., and Wolfson, H. J. (2005) PatchDock and SymmDock: servers for rigid and symmetric docking. *Nucleic acids research* **33**, W363-367
  13. Mashiach, E., Schneidman-Duhovny, D., Andrusier, N., Nussinov, R., and Wolfson, H. J. (2008) FireDock: a web server for fast interaction refinement in molecular docking. *Nucleic acids research* **36**, W229-232
  14. Andrusier, N., Nussinov, R., and Wolfson, H. J. (2007) FireDock: fast interaction refinement in molecular docking. *Proteins* **69**, 139-15
